# Supplementary material for: Intra-Population Variation of Secondary Metabolites in Cistus ladanifer L
Source: PubMed Central journal article supplement (PMC6274576; doi:10.3390/molecules21070945), 2016-07-21
Supplement: molecules-21-00945-s001.pdf [file molecules-21-00945-s001.pdf]

# Supplementary Materials: Intra-Population Variation of Secondary Metabolites in *Cistus ladanifer* L.

Cristina Valares Masa, Juan Carlos Alías Gallego, Natividad Chaves Lobón and Teresa Sosa Díaz

**Table S1.** Total flavonoids and diterpenes (mg/g DW) in exudate in a population of *Cistus ladanifer*, mean, SD, n=100. Ap: apigenin; Ap-4: apigenin 4'-methyl ether; Ap-7: apigenin 7-methyl ether; K-3: kaempferol 3-methyl ether; K-3,7: kaempferol 3,7-di-O-methyl ether; Dt-1: 6 $\beta$ -acetoxy-7-oxo-8-labden-15-oic acid; Dt-2: 7-oxo-8-labden-15-oic acid; Dt-3: oxocaticic acid.

| Individual | Ap   |        | Ap-4 |        | Ap-7 |        | K-3  |        | K-3,7 |        | Dt-1 |        | Dt-2 |        | Dt-3 |        | Total Compounds | Total Flavonoids | Total Diterpenes |
|------------|------|--------|------|--------|------|--------|------|--------|-------|--------|------|--------|------|--------|------|--------|-----------------|------------------|------------------|
| Group A    |      |        |      |        |      |        |      |        |       |        |      |        |      |        |      |        |                 |                  |                  |
| 3          | 0.11 | ± 0.01 | 1.09 | ± 0.03 | 1.68 | ± 0.09 | 1.94 | ± 0.11 | 23.01 | ± 1.63 | 0.93 | ± 0.09 | 0.07 | ± 0.01 | 0.11 | ± 0.03 | 28.95           | 27.84            | 1.11             |
| 4          | 0.11 | ± 0.01 | 0.86 | ± 0.07 | 1.85 | ± 0.20 | 2.00 | ± 0.27 | 20.79 | ± 1.58 | 1.32 | ± 0.21 | 0.09 | ± 0.01 | 0.09 | ± 0.01 | 27.10           | 25.61            | 1.50             |
| 5          | 0.17 | ± 0.05 | 1.45 | ± 0.13 | 2.58 | ± 0.07 | 2.27 | ± 0.22 | 18.69 | ± 1.03 | 1.25 | ± 0.21 | 0.08 | ± 0.01 | 0.08 | ± 0.00 | 26.57           | 25.15            | 1.42             |
| 6          | 0.09 | ± 0.03 | 0.91 | ± 0.08 | 1.59 | ± 0.06 | 0.64 | ± 0.02 | 8.55  | ± 2.67 | 1.07 | ± 0.09 | 0.05 | ± 0.01 | 0.03 | ± 0.01 | 12.93           | 11.78            | 1.14             |
| 7          | 0.17 | ± 0.03 | 1.35 | ± 0.12 | 2.82 | ± 0.17 | 2.19 | ± 0.11 | 18.20 | ± 2.35 | 1.38 | ± 0.23 | 0.07 | ± 0.02 | 0.06 | ± 0.00 | 26.24           | 24.73            | 1.51             |
| 8          | 0.27 | ± 0.08 | 1.25 | ± 0.19 | 1.99 | ± 0.07 | 4.64 | ± 0.22 | 19.52 | ± 4.81 | 1.11 | ± 0.19 | 0.07 | ± 0.03 | 0.05 | ± 0.04 | 28.91           | 27.67            | 1.24             |
| 9          | 0.18 | ± 0.03 | 1.12 | ± 0.12 | 1.83 | ± 0.04 | 3.00 | ± 0.23 | 14.76 | ± 3.13 | 1.25 | ± 0.06 | 0.06 | ± 0.01 | 0.05 | ± 0.01 | 22.26           | 20.90            | 1.36             |
| 10         | 0.27 | ± 0.05 | 1.03 | ± 0.10 | 3.56 | ± 0.13 | 4.18 | ± 0.27 | 25.14 | ± 2.85 | 1.32 | ± 0.08 | 0.08 | ± 0.01 | 0.09 | ± 0.01 | 35.68           | 34.19            | 1.50             |
| 11         | 0.32 | ± 0.09 | 1.83 | ± 0.58 | 2.46 | ± 0.15 | 3.55 | ± 0.18 | 18.20 | ± 2.88 | 1.10 | ± 0.06 | 0.06 | ± 0.01 | 0.05 | ± 0.01 | 27.57           | 26.36            | 1.21             |
| 12         | 0.17 | ± 0.04 | 0.98 | ± 0.17 | 4.28 | ± 0.67 | 4.49 | ± 0.26 | 28.81 | ± 3.38 | 1.35 | ± 0.06 | 0.07 | ± 0.01 | 0.09 | ± 0.01 | 40.25           | 38.74            | 1.51             |
| 13         | 0.19 | ± 0.06 | 0.89 | ± 0.17 | 3.48 | ± 0.17 | 2.98 | ± 0.10 | 16.93 | ± 3.68 | 0.72 | ± 0.04 | 0.06 | ± 0.01 | 0.08 | ± 0.03 | 25.33           | 24.47            | 0.86             |
| 14         | 0.11 | ± 0.02 | 0.82 | ± 0.07 | 1.75 | ± 0.08 | 2.87 | ± 0.09 | 15.59 | ± 2.87 | 0.65 | ± 0.05 | 0.04 | ± 0.01 | 0.05 | ± 0.02 | 21.89           | 21.15            | 0.74             |
| 15         | 0.11 | ± 0.01 | 1.41 | ± 0.42 | 1.15 | ± 0.17 | 3.41 | ± 0.17 | 10.46 | ± 2.16 | 0.53 | ± 0.04 | 0.02 | ± 0.00 | 0.04 | ± 0.02 | 17.14           | 16.55            | 0.59             |
| 16         | 0.13 | ± 0.03 | 0.73 | ± 0.03 | 1.35 | ± 0.06 | 3.92 | ± 0.13 | 13.18 | ± 3.13 | 0.64 | ± 0.04 | 0.03 | ± 0.00 | 0.03 | ± 0.02 | 20.00           | 19.30            | 0.70             |
| 17         | 0.09 | ± 0.02 | 0.52 | ± 0.05 | 1.39 | ± 0.17 | 3.18 | ± 0.10 | 16.00 | ± 3.36 | 0.51 | ± 0.02 | 0.03 | ± 0.01 | 0.05 | ± 0.02 | 21.77           | 21.18            | 0.59             |
| 18         | 0.13 | ± 0.02 | 0.86 | ± 0.10 | 1.41 | ± 0.20 | 3.71 | ± 0.21 | 11.25 | ± 1.20 | 0.61 | ± 0.09 | 0.02 | ± 0.00 | 0.04 | ± 0.01 | 18.03           | 17.36            | 0.67             |
| 19         | 0.19 | ± 0.03 | 0.81 | ± 0.12 | 3.13 | ± 0.16 | 3.31 | ± 0.19 | 14.30 | ± 3.37 | 0.60 | ± 0.03 | 0.05 | ± 0.01 | 0.06 | ± 0.01 | 22.44           | 21.74            | 0.71             |
| 20         | 0.05 | ± 0.01 | 0.51 | ± 0.06 | 0.69 | ± 0.03 | 1.13 | ± 0.04 | 4.41  | ± 0.41 | 0.33 | ± 0.07 | 0.02 | ± 0.00 | 0.01 | ± 0.01 | 7.15            | 6.79             | 0.36             |
| 21         | 0.14 | ± 0.05 | 0.96 | ± 0.13 | 1.61 | ± 0.19 | 2.70 | ± 0.06 | 9.65  | ± 0.85 | 0.49 | ± 0.07 | 0.03 | ± 0.01 | 0.03 | ± 0.02 | 15.61           | 15.06            | 0.55             |
| 22         | 0.08 | ± 0.00 | 0.83 | ± 0.05 | 0.92 | ± 0.04 | 1.94 | ± 0.03 | 6.34  | ± 0.92 | 0.39 | ± 0.05 | 0.02 | ± 0.00 | 0.02 | ± 0.00 | 10.55           | 10.11            | 0.44             |
| 23         | 0.11 | ± 0.03 | 0.95 | ± 0.11 | 1.68 | ± 0.15 | 2.54 | ± 0.07 | 8.28  | ± 0.84 | 0.57 | ± 0.08 | 0.03 | ± 0.02 | 0.04 | ± 0.01 | 14.19           | 13.55            | 0.64             |
| 24         | 0.07 | ± 0.01 | 0.63 | ± 0.08 | 1.18 | ± 0.13 | 2.35 | ± 0.09 | 7.51  | ± 2.18 | 0.41 | ± 0.05 | 0.02 | ± 0.01 | 0.03 | ± 0.01 | 12.20           | 11.74            | 0.46             |
| 25         | 0.11 | ± 0.01 | 0.74 | ± 0.06 | 1.30 | ± 0.14 | 3.54 | ± 0.14 | 8.07  | ± 1.66 | 0.51 | ± 0.08 | 0.02 | ± 0.00 | 0.05 | ± 0.01 | 14.34           | 13.76            | 0.58             |
| 26         | 0.07 | ± 0.01 | 0.98 | ± 0.05 | 1.22 | ± 0.04 | 2.50 | ± 0.06 | 8.99  | ± 0.70 | 0.66 | ± 0.04 | 0.02 | ± 0.00 | 0.02 | ± 0.00 | 14.46           | 13.75            | 0.70             |
| 27         | 0.15 | ± 0.05 | 1.01 | ± 0.31 | 2.02 | ± 0.14 | 5.00 | ± 0.39 | 16.30 | ± 3.25 | 0.66 | ± 0.09 | 0.03 | ± 0.01 | 0.03 | ± 0.00 | 25.20           | 24.48            | 0.72             |
| 28         | 0.12 | ± 0.03 | 0.81 | ± 0.08 | 1.36 | ± 0.02 | 2.82 | ± 0.11 | 6.44  | ± 1.43 | 0.42 | ± 0.02 | 0.10 | ± 0.02 | 0.02 | ± 0.01 | 12.09           | 11.55            | 0.54             |
| 29         | 0.06 | ± 0.00 | 0.80 | ± 0.03 | 0.89 | ± 0.07 | 1.72 | ± 0.03 | 5.33  | ± 1.13 | 0.42 | ± 0.07 | 0.06 | ± 0.03 | 0.04 | ± 0.01 | 9.32            | 8.80             | 0.52             |
| 30         | 0.12 | ± 0.01 | 0.93 | ± 0.05 | 0.97 | ± 0.02 | 3.89 | ± 0.18 | 5.64  | ± 1.80 | 0.41 | ± 0.05 | 0.02 | ± 0.00 | 0.04 | ± 0.00 | 12.04           | 11.56            | 0.48             |
| 31         | 0.28 | ± 0.03 | 2.15 | ± 0.24 | 3.21 | ± 0.32 | 4.43 | ± 0.20 | 12.83 | ± 0.56 | 2.17 | ± 0.00 | 0.05 | ± 0.01 | 0.09 | ± 0.03 | 25.23           | 22.91            | 2.32             |
| 33         | 0.30 | ± 0.05 | 2.07 | ± 0.36 | 3.01 | ± 0.12 | 6.14 | ± 0.45 | 13.80 | ± 2.69 | 1.06 | ± 0.05 | 0.07 | ± 0.02 | 0.05 | ± 0.01 | 26.51           | 25.33            | 1.17             |

Table S1. Cont.

| Individual | Ap   |        | Ap-4 |        | Ap-7 |        | K-3  |        | K-3.7 |        | Dt-1 |        | Dt-2 |        | Dt-3 |        | Total Compounds | Total Flavonoids | Total Diterpenes |  |
|------------|------|--------|------|--------|------|--------|------|--------|-------|--------|------|--------|------|--------|------|--------|-----------------|------------------|------------------|--|
| Group A    |      |        |      |        |      |        |      |        |       |        |      |        |      |        |      |        |                 |                  |                  |  |
| 34         | 0.18 | ± 0.04 | 1.92 | ± 0.15 | 3.17 | ± 0.45 | 6.10 | ± 0.55 | 25.82 | ± 4.48 | 1.07 | ± 0.08 | 0.05 | ± 0.01 | 0.07 | ± 0.02 | 38.37           | 37.18            | 1.19             |  |
| 35         | 0.13 | ± 0.02 | 1.39 | ± 0.12 | 2.04 | ± 0.11 | 4.58 | ± 0.18 | 14.30 | ± 1.57 | 0.82 | ± 0.02 | 0.04 | ± 0.00 | 0.03 | ± 0.01 | 23.33           | 22.44            | 0.89             |  |
| 36         | 0.15 | ± 0.04 | 2.32 | ± 0.28 | 2.81 | ± 0.35 | 3.84 | ± 0.19 | 11.15 | ± 1.20 | 1.76 | ± 0.04 | 0.06 | ± 0.00 | 0.04 | ± 0.02 | 22.13           | 20.27            | 1.86             |  |
| 38         | 0.16 | ± 0.01 | 1.93 | ± 0.22 | 2.52 | ± 0.23 | 3.31 | ± 0.16 | 22.65 | ± 1.18 | 0.54 | ± 0.03 | 0.05 | ± 0.00 | 0.11 | ± 0.01 | 31.27           | 30.57            | 0.69             |  |
| 39         | 0.27 | ± 0.01 | 2.93 | ± 0.26 | 2.98 | ± 0.18 | 3.85 | ± 0.20 | 12.72 | ± 0.87 | 1.69 | ± 0.02 | 0.07 | ± 0.01 | 0.08 | ± 0.01 | 24.59           | 22.75            | 1.84             |  |
| 40         | 0.28 | ± 0.06 | 1.73 | ± 0.14 | 2.61 | ± 0.19 | 7.35 | ± 0.33 | 16.91 | ± 3.47 | 1.92 | ± 0.08 | 0.03 | ± 0.01 | 0.09 | ± 0.03 | 30.92           | 28.89            | 2.03             |  |
| 47         | 0.18 | ± 0.02 | 2.02 | ± 0.19 | 2.98 | ± 0.32 | 3.44 | ± 0.22 | 21.01 | ± 0.84 | 1.47 | ± 0.03 | 0.09 | ± 0.01 | 0.11 | ± 0.01 | 31.30           | 29.63            | 1.67             |  |
| 48         | 0.21 | ± 0.01 | 2.10 | ± 0.18 | 3.72 | ± 0.30 | 5.65 | ± 0.51 | 27.08 | ± 3.40 | 1.24 | ± 0.10 | 0.06 | ± 0.00 | 0.10 | ± 0.01 | 40.16           | 38.76            | 1.40             |  |
| 49         | 0.17 | ± 0.01 | 1.98 | ± 0.04 | 2.61 | ± 0.14 | 4.77 | ± 0.26 | 16.88 | ± 3.62 | 1.18 | ± 0.03 | 0.06 | ± 0.01 | 0.03 | ± 0.01 | 27.67           | 26.41            | 1.26             |  |
| 51         | 0.23 | ± 0.07 | 1.72 | ± 0.12 | 3.46 | ± 0.15 | 3.88 | ± 0.18 | 22.16 | ± 2.52 | 1.07 | ± 0.03 | 0.05 | ± 0.02 | 0.08 | ± 0.04 | 32.66           | 31.45            | 1.20             |  |
| 56         | 0.16 | ± 0.01 | 2.83 | ± 0.14 | 3.24 | ± 0.16 | 2.78 | ± 0.16 | 13.95 | ± 0.69 | 1.79 | ± 0.05 | 0.10 | ± 0.00 | 0.05 | ± 0.01 | 24.89           | 22.95            | 1.93             |  |
| 57         | 0.21 | ± 0.04 | 3.23 | ± 0.34 | 3.21 | ± 0.12 | 2.01 | ± 0.13 | 12.83 | ± 1.41 | 1.69 | ± 0.03 | 0.09 | ± 0.01 | 0.09 | ± 0.01 | 23.36           | 21.49            | 1.87             |  |
| 59         | 0.13 | ± 0.04 | 1.86 | ± 0.13 | 2.62 | ± 0.17 | 1.16 | ± 0.13 | 8.81  | ± 0.29 | 1.28 | ± 0.03 | 0.05 | ± 0.01 | 0.02 | ± 0.00 | 15.95           | 14.59            | 1.36             |  |
| 60         | 0.19 | ± 0.03 | 2.01 | ± 0.07 | 2.57 | ± 0.19 | 2.67 | ± 0.18 | 13.43 | ± 1.69 | 0.98 | ± 0.11 | 0.04 | ± 0.01 | 0.02 | ± 0.00 | 21.91           | 20.87            | 1.04             |  |
| 61         | 0.21 | ± 0.02 | 2.39 | ± 0.09 | 2.80 | ± 0.08 | 2.99 | ± 0.17 | 12.02 | ± 2.37 | 1.40 | ± 0.05 | 0.07 | ± 0.00 | 0.03 | ± 0.00 | 21.92           | 20.42            | 1.50             |  |
| 62         | 0.26 | ± 0.08 | 2.69 | ± 0.50 | 3.52 | ± 0.18 | 3.87 | ± 0.14 | 11.68 | ± 1.71 | 1.79 | ± 0.04 | 0.07 | ± 0.02 | 0.06 | ± 0.02 | 23.93           | 22.01            | 1.92             |  |
| 65         | 0.20 | ± 0.02 | 2.76 | ± 0.40 | 3.37 | ± 0.15 | 1.69 | ± 0.04 | 9.89  | ± 1.39 | 1.78 | ± 0.04 | 0.08 | ± 0.01 | 0.10 | ± 0.00 | 19.87           | 17.91            | 1.96             |  |
| 66         | 0.22 | ± 0.02 | 3.32 | ± 0.40 | 3.71 | ± 0.38 | 2.13 | ± 0.11 | 10.63 | ± 2.25 | 1.18 | ± 0.01 | 0.08 | ± 0.01 | 0.10 | ± 0.01 | 21.37           | 20.01            | 1.36             |  |
| 67         | 0.27 | ± 0.06 | 3.38 | ± 0.30 | 4.16 | ± 0.57 | 2.75 | ± 0.09 | 11.09 | ± 1.30 | 1.34 | ± 0.02 | 0.05 | ± 0.01 | 0.06 | ± 0.01 | 23.11           | 21.66            | 1.45             |  |
| 68         | 0.30 | ± 0.06 | 3.61 | ± 0.16 | 4.10 | ± 0.22 | 3.90 | ± 0.14 | 14.00 | ± 0.87 | 1.16 | ± 0.03 | 0.05 | ± 0.01 | 0.08 | ± 0.02 | 27.21           | 25.92            | 1.29             |  |
| 70         | 0.18 | ± 0.03 | 2.01 | ± 0.05 | 2.67 | ± 0.24 | 3.59 | ± 0.15 | 12.43 | ± 1.30 | 1.23 | ± 0.01 | 0.07 | ± 0.03 | 0.04 | ± 0.01 | 22.22           | 20.88            | 1.33             |  |
| 71         | 0.18 | ± 0.03 | 1.93 | ± 0.19 | 2.86 | ± 0.14 | 3.08 | ± 0.29 | 14.95 | ± 2.62 | 1.17 | ± 0.07 | 0.04 | ± 0.00 | 0.10 | ± 0.05 | 24.30           | 22.99            | 1.31             |  |
| 72         | 0.21 | ± 0.04 | 2.67 | ± 0.15 | 3.19 | ± 0.20 | 4.80 | ± 0.67 | 17.55 | ± 1.49 | 1.89 | ± 0.02 | 0.10 | ± 0.03 | 0.11 | ± 0.04 | 30.52           | 28.42            | 2.10             |  |
| 74         | 0.23 | ± 0.06 | 2.40 | ± 0.40 | 2.27 | ± 0.23 | 5.98 | ± 0.19 | 12.48 | ± 0.98 | 0.98 | ± 0.02 | 0.05 | ± 0.01 | 0.06 | ± 0.02 | 24.44           | 23.35            | 1.09             |  |
| 78         | 0.25 | ± 0.01 | 2.10 | ± 0.20 | 2.72 | ± 0.17 | 5.75 | ± 0.50 | 15.45 | ± 1.58 | 1.08 | ± 0.17 | 0.09 | ± 0.04 | 0.08 | ± 0.02 | 27.50           | 26.26            | 1.24             |  |
| 81         | 0.20 | ± 0.04 | 1.60 | ± 0.61 | 2.66 | ± 0.09 | 6.34 | ± 0.73 | 21.18 | ± 2.00 | 1.42 | ± 0.05 | 0.08 | ± 0.02 | 0.07 | ± 0.01 | 33.55           | 31.99            | 1.56             |  |
| 82         | 0.16 | ± 0.02 | 1.91 | ± 0.15 | 2.67 | ± 0.20 | 3.32 | ± 0.23 | 12.82 | ± 0.45 | 1.59 | ± 0.09 | 0.08 | ± 0.00 | 0.04 | ± 0.00 | 22.58           | 20.88            | 1.70             |  |
| 85         | 0.27 | ± 0.02 | 2.35 | ± 0.07 | 2.85 | ± 0.10 | 4.39 | ± 0.52 | 19.35 | ± 2.02 | 1.61 | ± 0.01 | 0.06 | ± 0.00 | 0.05 | ± 0.00 | 30.91           | 29.19            | 1.72             |  |
| 88         | 0.31 | ± 0.02 | 2.37 | ± 0.16 | 3.08 | ± 0.07 | 7.68 | ± 0.57 | 20.15 | ± 2.46 | 1.69 | ± 0.02 | 0.06 | ± 0.01 | 0.03 | ± 0.00 | 35.37           | 33.60            | 1.78             |  |
| 89         | 0.18 | ± 0.01 | 1.90 | ± 0.16 | 2.47 | ± 0.20 | 7.09 | ± 0.31 | 12.48 | ± 1.05 | 0.90 | ± 0.02 | 0.05 | ± 0.01 | 0.11 | ± 0.02 | 25.17           | 24.12            | 1.06             |  |
| 93         | 0.17 | ± 0.04 | 1.75 | ± 0.10 | 2.56 | ± 0.13 | 4.41 | ± 0.12 | 20.52 | ± 3.27 | 0.66 | ± 0.05 | 0.04 | ± 0.00 | 0.09 | ± 0.02 | 30.19           | 29.40            | 0.78             |  |
| 94         | 0.19 | ± 0.04 | 1.96 | ± 0.10 | 3.70 | ± 0.25 | 4.32 | ± 0.48 | 29.97 | ± 3.13 | 1.06 | ± 0.03 | 0.04 | ± 0.01 | 0.07 | ± 0.02 | 41.31           | 40.14            | 1.17             |  |
| 96         | 0.19 | ± 0.03 | 1.97 | ± 0.12 | 2.88 | ± 0.14 | 2.14 | ± 0.16 | 8.30  | ± 0.47 | 0.95 | ± 0.06 | 0.05 | ± 0.01 | 0.11 | ± 0.01 | 16.60           | 15.48            | 1.11             |  |
| 97         | 0.13 | ± 0.00 | 1.64 | ± 0.20 | 2.70 | ± 0.15 | 2.42 | ± 0.15 | 22.01 | ± 1.50 | 0.85 | ± 0.02 | 0.04 | ± 0.01 | 0.06 | ± 0.02 | 29.85           | 28.91            | 0.94             |  |
| 99         | 0.24 | ± 0.06 | 1.88 | ± 0.16 | 2.61 | ± 1.16 | 2.52 | ± 0.18 | 14.74 | ± 0.09 | 2.03 | ± 0.08 | 0.07 | ± 0.03 | 0.07 | ± 0.01 | 24.15           | 21.98            | 2.17             |  |
| 100        | 0.24 | ± 0.04 | 2.17 | ± 0.24 | 2.94 | ± 0.07 | 5.52 | ± 0.36 | 19.01 | ± 0.91 | 0.89 | ± 0.01 | 0.03 | ± 0.00 | 0.08 | ± 0.02 | 30.89           | 29.89            | 1.01             |  |

Table S1. Cont.

| Individual | Ap   |        | Ap-4 |        | Ap-7 |        | K-3   |        | K-3.7 |        | Dt-1 |        | Dt-2 |        | Dt-3 |        | Total Compounds | Total Flavonoids | Total Diterpenes |  |
|------------|------|--------|------|--------|------|--------|-------|--------|-------|--------|------|--------|------|--------|------|--------|-----------------|------------------|------------------|--|
| Group B    |      |        |      |        |      |        |       |        |       |        |      |        |      |        |      |        |                 |                  |                  |  |
| 41         | 0.38 | ± 0.07 | 2.76 | ± 0.22 | 3.57 | ± 0.23 | 8.66  | ± 0.66 | 26.85 | ± 1.89 | 1.16 | ± 0.03 | 0.07 | ± 0.01 | 0.08 | ± 0.03 | 43.52           | 42.21            | 1.31             |  |
| 42         | 0.42 | ± 0.05 | 2.52 | ± 0.09 | 4.58 | ± 0.02 | 11.34 | ± 0.72 | 39.49 | ± 0.93 | 1.62 | ± 0.03 | 0.06 | ± 0.02 | 0.14 | ± 0.01 | 60.17           | 58.35            | 1.82             |  |
| 52         | 0.49 | ± 0.03 | 2.71 | ± 0.32 | 5.44 | ± 0.19 | 8.93  | ± 1.47 | 29.88 | ± 1.87 | 1.42 | ± 0.02 | 0.12 | ± 0.02 | 0.03 | ± 0.00 | 49.03           | 47.45            | 1.58             |  |
| 73         | 0.31 | ± 0.10 | 2.13 | ± 0.16 | 3.79 | ± 0.11 | 11.04 | ± 3.39 | 37.40 | ± 4.89 | 0.96 | ± 0.02 | 0.11 | ± 0.01 | 0.04 | ± 0.00 | 55.78           | 54.67            | 1.11             |  |
| 75         | 0.50 | ± 0.06 | 3.26 | ± 0.20 | 5.41 | ± 0.70 | 14.57 | ± 2.27 | 30.56 | ± 5.39 | 1.46 | ± 0.02 | 0.07 | ± 0.01 | 0.08 | ± 0.01 | 55.91           | 54.30            | 1.62             |  |
| 79         | 0.61 | ± 0.09 | 3.75 | ± 0.31 | 5.01 | ± 0.54 | 12.44 | ± 2.41 | 45.64 | ± 3.23 | 1.61 | ± 0.09 | 0.10 | ± 0.02 | 0.09 | ± 0.02 | 69.25           | 67.45            | 1.80             |  |
| 83         | 0.49 | ± 0.07 | 2.87 | ± 0.14 | 5.48 | ± 0.53 | 10.13 | ± 4.73 | 30.32 | ± 5.43 | 2.06 | ± 0.05 | 0.07 | ± 0.01 | 0.08 | ± 0.04 | 51.51           | 49.29            | 2.22             |  |
| 87         | 0.39 | ± 0.09 | 2.45 | ± 0.31 | 4.86 | ± 0.38 | 9.77  | ± 2.86 | 30.73 | ± 5.09 | 1.17 | ± 0.02 | 0.05 | ± 0.01 | 0.11 | ± 0.02 | 49.52           | 48.19            | 1.34             |  |
| Group C    |      |        |      |        |      |        |       |        |       |        |      |        |      |        |      |        |                 |                  |                  |  |
| 1          | 0.15 | ± 0.05 | 0.96 | ± 0.08 | 2.17 | ± 0.10 | 3.09  | ± 1.94 | 25.92 | ± 3.73 | 1.23 | ± 0.08 | 0.07 | ± 0.04 | 0.18 | ± 0.07 | 33.78           | 32.29            | 1.48             |  |
| 2          | 0.19 | ± 0.04 | 0.91 | ± 0.08 | 2.69 | ± 0.04 | 3.65  | ± 0.35 | 23.72 | ± 4.18 | 1.22 | ± 0.01 | 0.07 | ± 0.01 | 0.16 | ± 0.06 | 32.62           | 31.17            | 1.45             |  |
| 84         | 0.30 | ± 0.08 | 2.06 | ± 0.20 | 3.45 | ± 0.19 | 5.87  | ± 0.36 | 25.87 | ± 3.77 | 1.80 | ± 0.02 | 0.09 | ± 0.01 | 0.19 | ± 0.02 | 39.63           | 37.55            | 2.08             |  |
| 86         | 0.27 | ± 0.01 | 3.00 | ± 0.08 | 3.75 | ± 0.21 | 4.08  | ± 0.29 | 25.76 | ± 1.85 | 2.33 | ± 0.02 | 0.08 | ± 0.00 | 0.18 | ± 0.02 | 39.44           | 36.85            | 2.58             |  |
| 90         | 0.29 | ± 0.03 | 2.46 | ± 0.16 | 3.24 | ± 0.14 | 7.18  | ± 1.21 | 38.43 | ± 2.48 | 1.82 | ± 0.03 | 0.09 | ± 0.01 | 0.19 | ± 0.03 | 53.70           | 51.59            | 2.11             |  |
| 91         | 0.31 | ± 0.02 | 1.89 | ± 0.08 | 5.05 | ± 0.31 | 2.46  | ± 0.16 | 24.52 | ± 2.34 | 1.19 | ± 0.02 | 0.05 | ± 0.01 | 0.16 | ± 0.03 | 35.64           | 34.24            | 1.40             |  |
| 92         | 0.24 | ± 0.06 | 2.89 | ± 0.06 | 3.28 | ± 0.28 | 3.40  | ± 1.44 | 22.70 | ± 2.91 | 0.77 | ± 0.02 | 0.04 | ± 0.01 | 0.23 | ± 0.06 | 33.55           | 32.51            | 1.03             |  |
| 98         | 0.22 | ± 0.02 | 1.75 | ± 0.07 | 3.27 | ± 0.26 | 4.54  | ± 0.56 | 28.70 | ± 4.20 | 0.85 | ± 0.04 | 0.05 | ± 0.00 | 0.18 | ± 0.03 | 39.56           | 38.48            | 1.08             |  |
| Group D    |      |        |      |        |      |        |       |        |       |        |      |        |      |        |      |        |                 |                  |                  |  |
| 32         | 0.31 | ± 0.04 | 1.98 | ± 0.06 | 4.63 | ± 0.12 | 7.42  | ± 1.36 | 28.47 | ± 0.61 | 1.80 | ± 0.03 | 0.07 | ± 0.01 | 0.14 | ± 0.04 | 44.82           | 42.81            | 2.01             |  |
| 37         | 0.20 | ± 0.06 | 2.38 | ± 0.15 | 3.00 | ± 0.19 | 4.60  | ± 0.12 | 13.72 | ± 2.02 | 2.94 | ± 0.08 | 0.06 | ± 0.01 | 0.12 | ± 0.03 | 27.03           | 23.91            | 3.12             |  |
| 43         | 0.32 | ± 0.04 | 2.10 | ± 0.09 | 4.62 | ± 0.25 | 7.56  | ± 3.83 | 31.27 | ± 1.31 | 2.11 | ± 0.02 | 0.08 | ± 0.01 | 0.09 | ± 0.04 | 48.15           | 45.87            | 2.28             |  |
| 44         | 0.34 | ± 0.02 | 2.42 | ± 0.10 | 4.52 | ± 0.27 | 4.75  | ± 1.10 | 23.82 | ± 3.90 | 1.93 | ± 0.03 | 0.06 | ± 0.04 | 0.11 | ± 0.04 | 37.94           | 35.85            | 2.09             |  |
| 45         | 0.28 | ± 0.02 | 2.81 | ± 0.11 | 4.07 | ± 0.02 | 4.34  | ± 0.66 | 24.39 | ± 1.57 | 2.03 | ± 0.11 | 0.10 | ± 0.01 | 0.09 | ± 0.01 | 38.11           | 35.89            | 2.22             |  |
| 46         | 0.38 | ± 0.01 | 3.09 | ± 0.06 | 4.54 | ± 0.07 | 4.76  | ± 0.34 | 23.59 | ± 1.70 | 2.23 | ± 0.09 | 0.11 | ± 0.01 | 0.13 | ± 0.02 | 38.81           | 36.35            | 2.46             |  |
| 50         | 0.29 | ± 0.01 | 2.91 | ± 0.01 | 3.93 | ± 0.20 | 2.84  | ± 0.37 | 20.66 | ± 4.32 | 2.36 | ± 0.12 | 0.11 | ± 0.01 | 0.07 | ± 0.01 | 33.17           | 30.64            | 2.53             |  |
| 53         | 0.30 | ± 0.05 | 2.97 | ± 0.33 | 3.60 | ± 0.23 | 7.47  | ± 1.36 | 26.85 | ± 4.56 | 2.65 | ± 0.07 | 0.13 | ± 0.04 | 0.07 | ± 0.02 | 44.04           | 41.19            | 2.85             |  |
| 54         | 0.28 | ± 0.00 | 3.39 | ± 0.38 | 3.77 | ± 0.31 | 3.79  | ± 0.84 | 13.04 | ± 1.23 | 2.07 | ± 0.03 | 0.12 | ± 0.04 | 0.06 | ± 0.01 | 26.52           | 24.28            | 2.25             |  |
| 55         | 0.40 | ± 0.02 | 3.65 | ± 0.28 | 4.39 | ± 0.13 | 11.07 | ± 0.69 | 19.74 | ± 1.07 | 2.00 | ± 0.02 | 0.08 | ± 0.01 | 0.15 | ± 0.01 | 41.47           | 39.25            | 2.23             |  |
| 58         | 0.27 | ± 0.03 | 2.98 | ± 0.14 | 3.37 | ± 0.10 | 3.29  | ± 0.70 | 17.70 | ± 3.15 | 2.50 | ± 0.01 | 0.10 | ± 0.01 | 0.05 | ± 0.00 | 30.27           | 27.61            | 2.65             |  |
| 63         | 0.28 | ± 0.03 | 3.63 | ± 0.20 | 4.01 | ± 0.24 | 4.18  | ± 0.85 | 13.37 | ± 2.21 | 1.82 | ± 0.05 | 0.08 | ± 0.01 | 0.13 | ± 0.01 | 27.51           | 25.48            | 2.03             |  |
| 64         | 0.34 | ± 0.07 | 3.46 | ± 0.24 | 4.31 | ± 0.57 | 4.92  | ± 0.91 | 18.83 | ± 3.74 | 1.20 | ± 0.03 | 0.10 | ± 0.02 | 0.09 | ± 0.02 | 33.25           | 31.86            | 1.38             |  |
| 69         | 0.36 | ± 0.09 | 3.23 | ± 0.15 | 3.92 | ± 0.19 | 6.17  | ± 1.92 | 18.35 | ± 4.28 | 1.42 | ± 0.06 | 0.07 | ± 0.01 | 0.13 | ± 0.03 | 33.65           | 32.03            | 1.62             |  |
| 76         | 0.49 | ± 0.10 | 2.98 | ± 0.11 | 4.42 | ± 0.50 | 8.21  | ± 3.32 | 20.13 | ± 3.29 | 1.51 | ± 0.03 | 0.08 | ± 0.03 | 0.11 | ± 0.02 | 37.92           | 36.22            | 1.69             |  |
| 77         | 0.36 | ± 0.06 | 2.98 | ± 0.37 | 3.80 | ± 0.28 | 6.04  | ± 2.96 | 21.00 | ± 2.37 | 1.35 | ± 0.03 | 0.08 | ± 0.01 | 0.08 | ± 0.03 | 35.68           | 34.17            | 1.50             |  |
| 80         | 0.30 | ± 0.08 | 2.73 | ± 0.14 | 3.79 | ± 0.11 | 7.66  | ± 2.26 | 20.27 | ± 3.43 | 1.49 | ± 0.06 | 0.08 | ± 0.02 | 0.11 | ± 0.04 | 36.44           | 34.75            | 1.68             |  |
| 95         | 0.36 | ± 0.02 | 3.35 | ± 0.36 | 4.40 | ± 0.28 | 7.55  | ± 0.44 | 35.26 | ± 1.58 | 2.07 | ± 0.02 | 0.12 | ± 0.01 | 0.09 | ± 0.01 | 53.19           | 50.92            | 2.27             |  |
